# Supplementary material for: Engineering the electronic structures and ferromagnetism of Fe2C monolayers via surface functionalization
Source: Royal Society of Chemistry journal article supplement (doi:10.1039/d4tc04570j), 2025-01-01
Supplement: d4tc04570j1.pdf [file d4tc04570j1.pdf]

## Supplementary Information

### Engineering the electronic structures and ferromagnetism of Fe<sub>2</sub>C monolayers via surface functionalization<sup>1</sup>

Xiaolong He <sup>a, &</sup>, Yaya Lou <sup>a, &</sup>, Dongni Wu <sup>a</sup>, and Jing Xie <sup>a, \*</sup>

<sup>a</sup> College of Physics and Electronic Science, Guizhou Normal University, Guiyang 550001, China

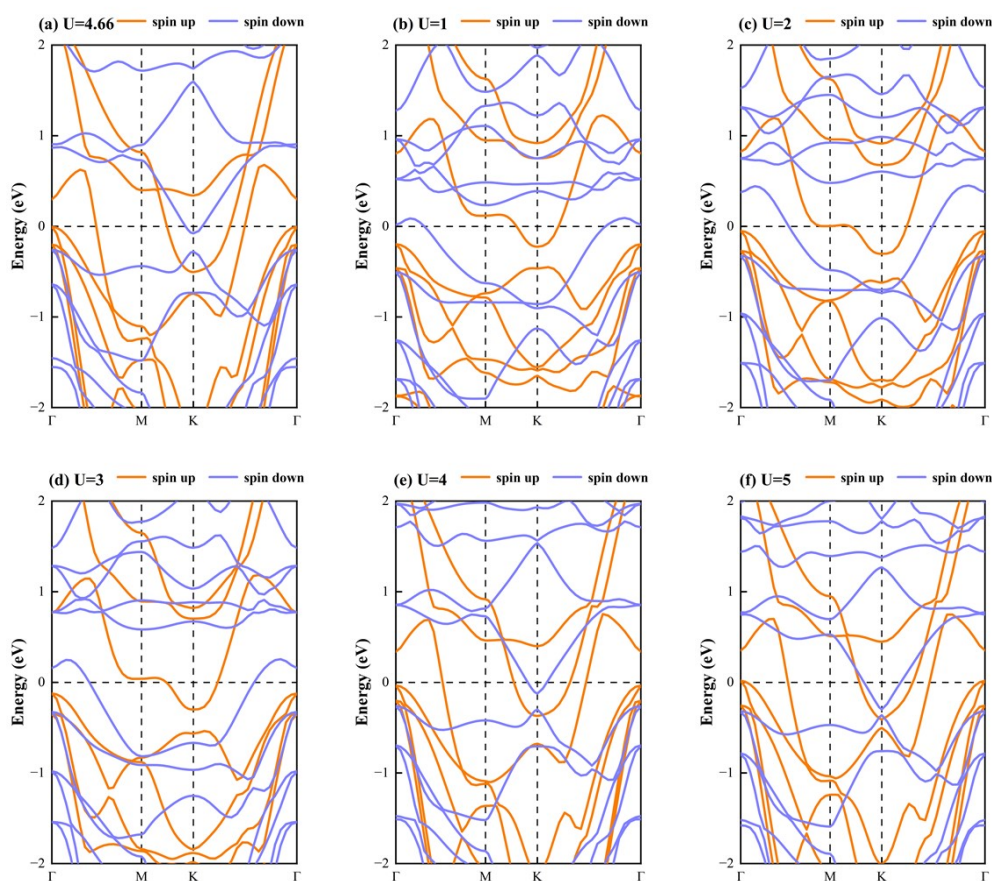

**Fig. S1.** The band structures of monolayer Fe<sub>2</sub>Br<sub>2</sub> based on PBE+U method. (a) U = 4.66 eV, (b) U = 1 eV, (c) U = 2 eV, (d) U = 3 eV, (e) U = 4 eV, (f) U = 5 eV.

\*Corresponding author at: College of Physics and Electronic Science, Guizhou Normal University, Guiyang 550001, China.

E-mail address: 511492231@qq.com (Jing Xie).

&These authors are co-first authors of the article.
